# Supplementary material for: Performance of new cyclotriphosphazene derivatives in photocatalytic reactions
Source: Royal Society of Chemistry journal article supplement (doi:10.1039/d4nj01541j), 2024-01-01
Supplement: d4nj01541j1.pdf [file d4nj01541j1.pdf]

## Performances of New Cyclotriphosphazene Derivatives in Photocatalytic Reactions

### Table of Contents

|                                                                                        |       |
|----------------------------------------------------------------------------------------|-------|
| MALDI-MS, $^1\text{H}$ , $^{13}\text{C}$ and $^{31}\text{P}$ NMR Spectra               | 2-14  |
| Molar Absorption Coefficient Studies                                                   | 15    |
| Singlet Oxygen Measurement of Methylene Blue                                           | 16-17 |
| $^1\text{H}$ NMR spectra of PS + 1,3-cyclohexadiene after irradiation with green light | 18-19 |

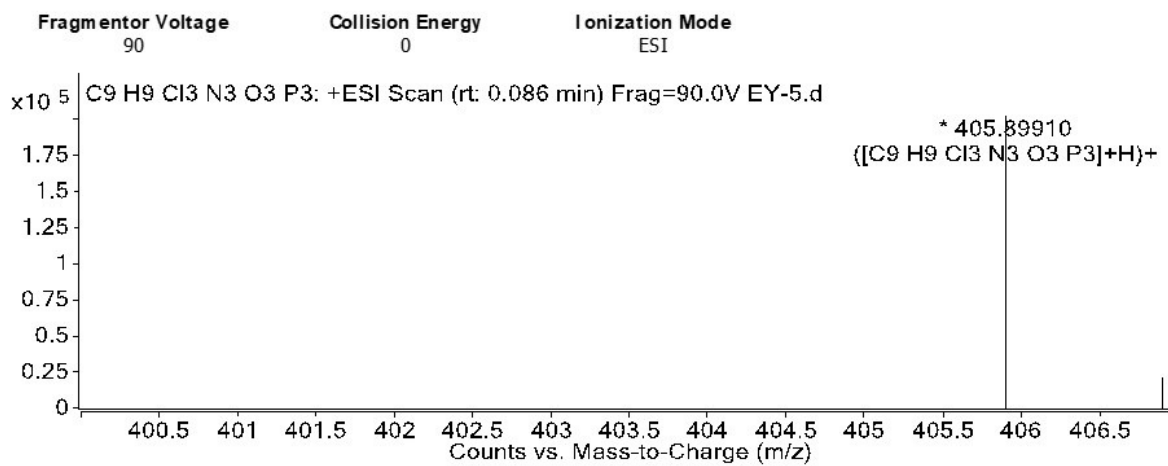

**Figure S1.** The QTOF-LS/MS spectrum of compound **1**

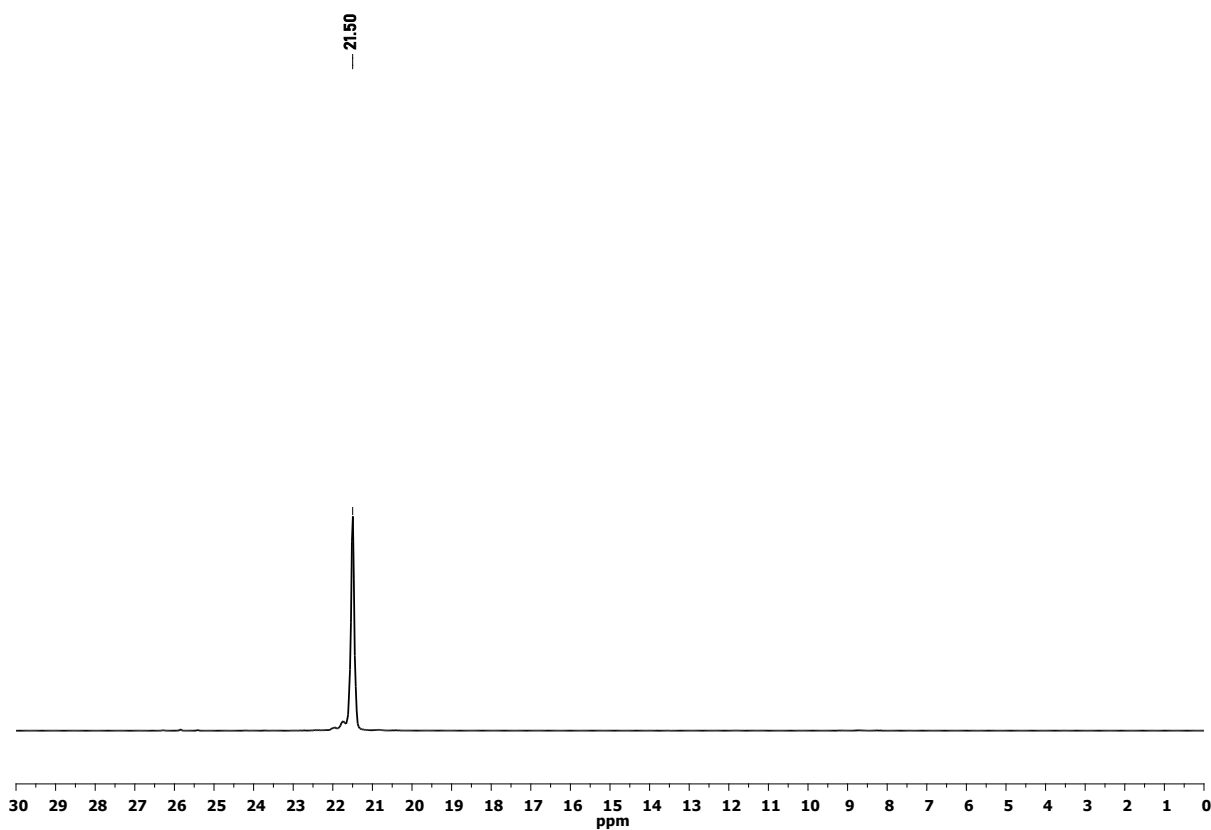

**Figure S2.** The proton-decoupled  $^{31}\text{P}$  NMR spectrum of compound **1** in  $\text{CDCl}_3$

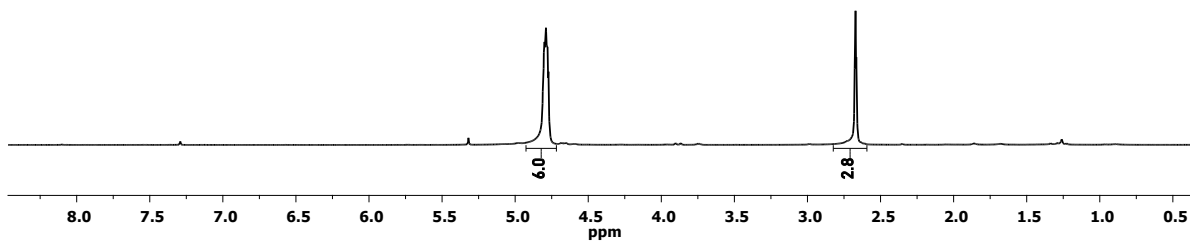

**Figure S3.** The  $^1\text{H}$  NMR spectrum of compound **1** in  $\text{CDCl}_3$

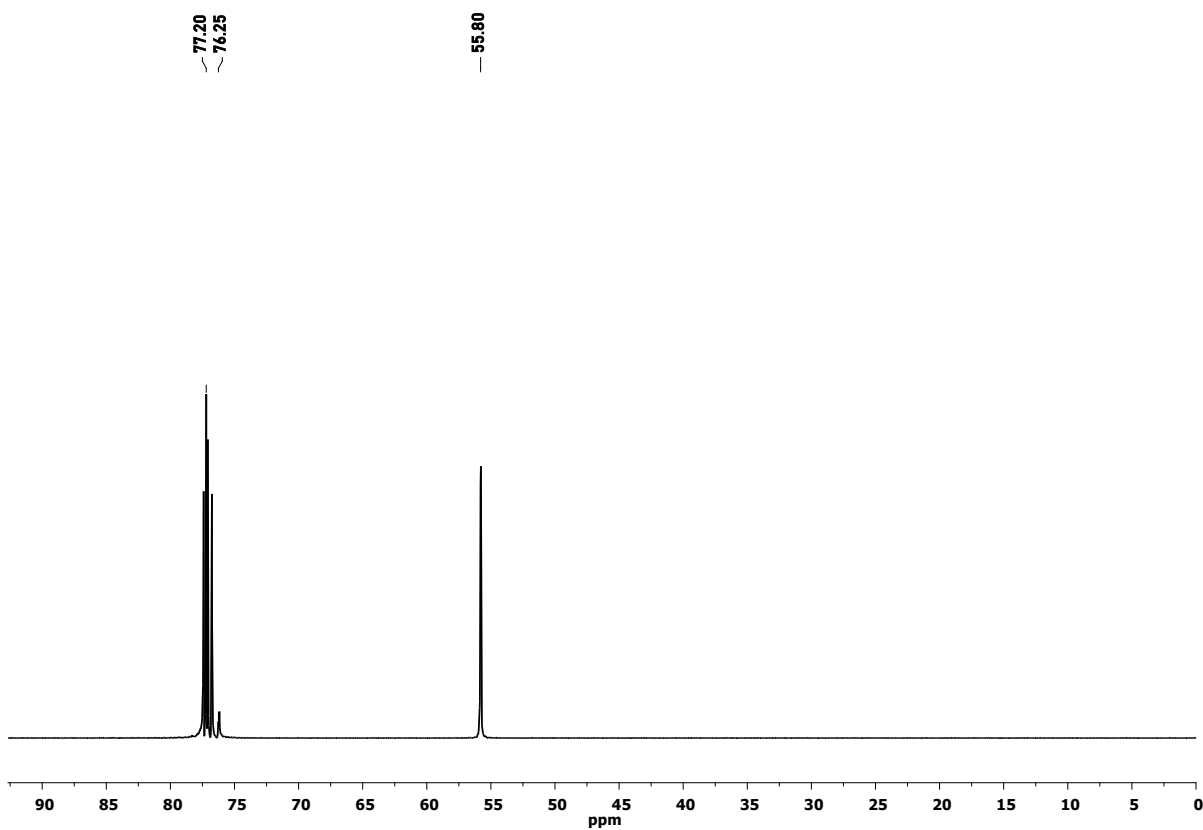

**Figure S4.** The  $^{13}\text{C}$  NMR spectrum of compound **1** in  $\text{CDCl}_3$

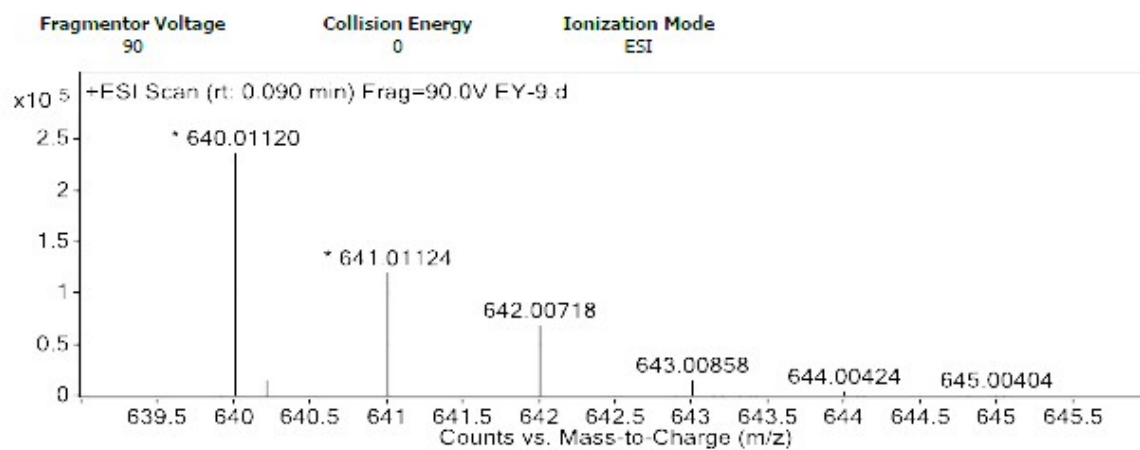

Figure S5. The QTOF-LS/MS spectrum of compound **2**

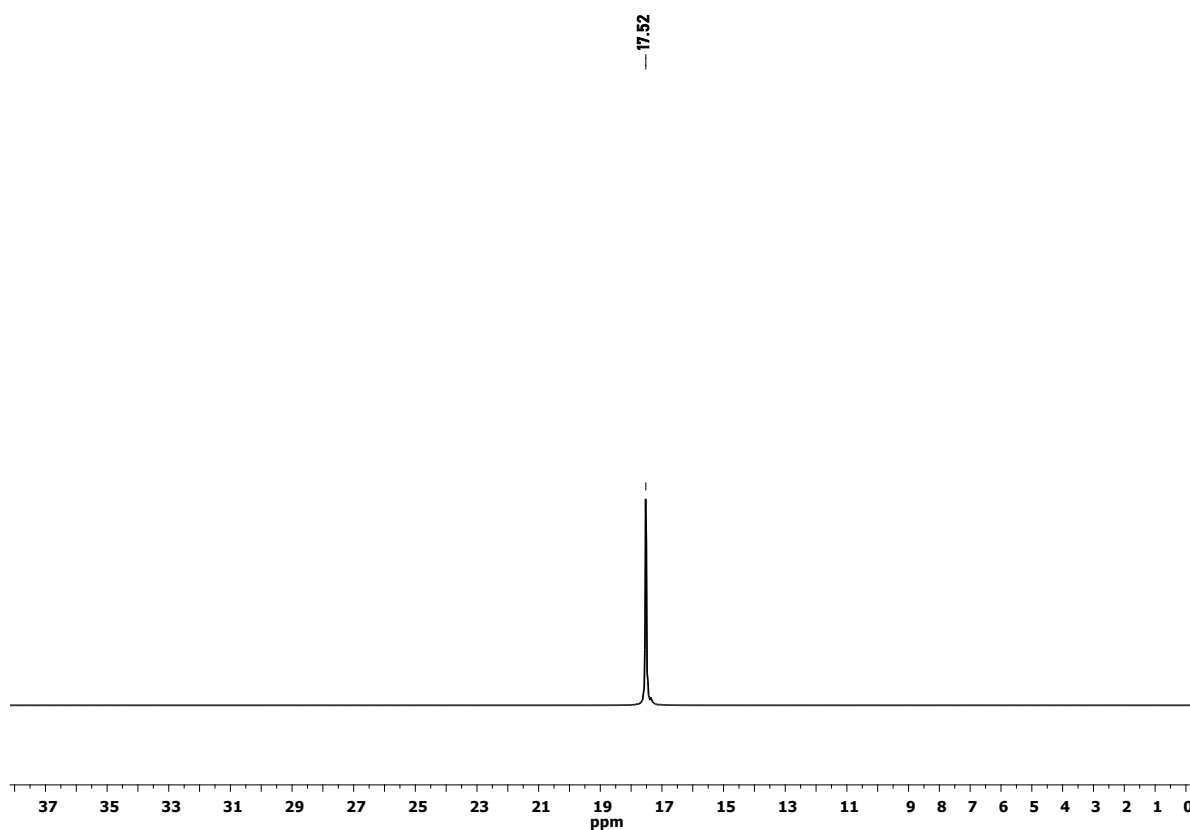

Figure S6. The proton-decoupled <sup>31</sup>P NMR spectrum of compound **2** in CDCl<sub>3</sub>

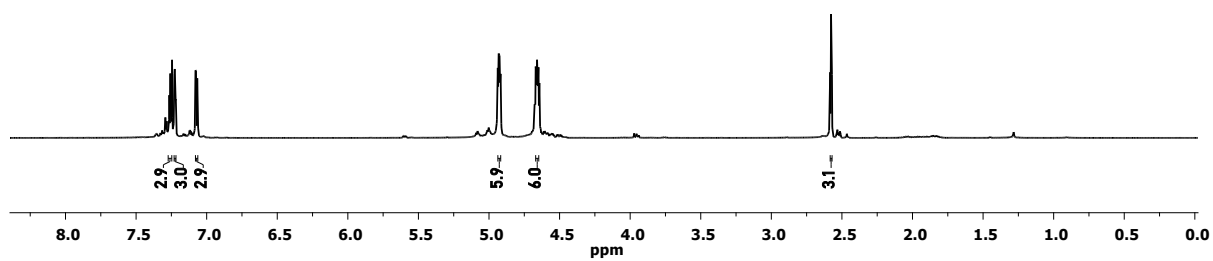

Figure S7. The  $^1\text{H}$  NMR spectrum of compound **2** in  $\text{CDCl}_3$

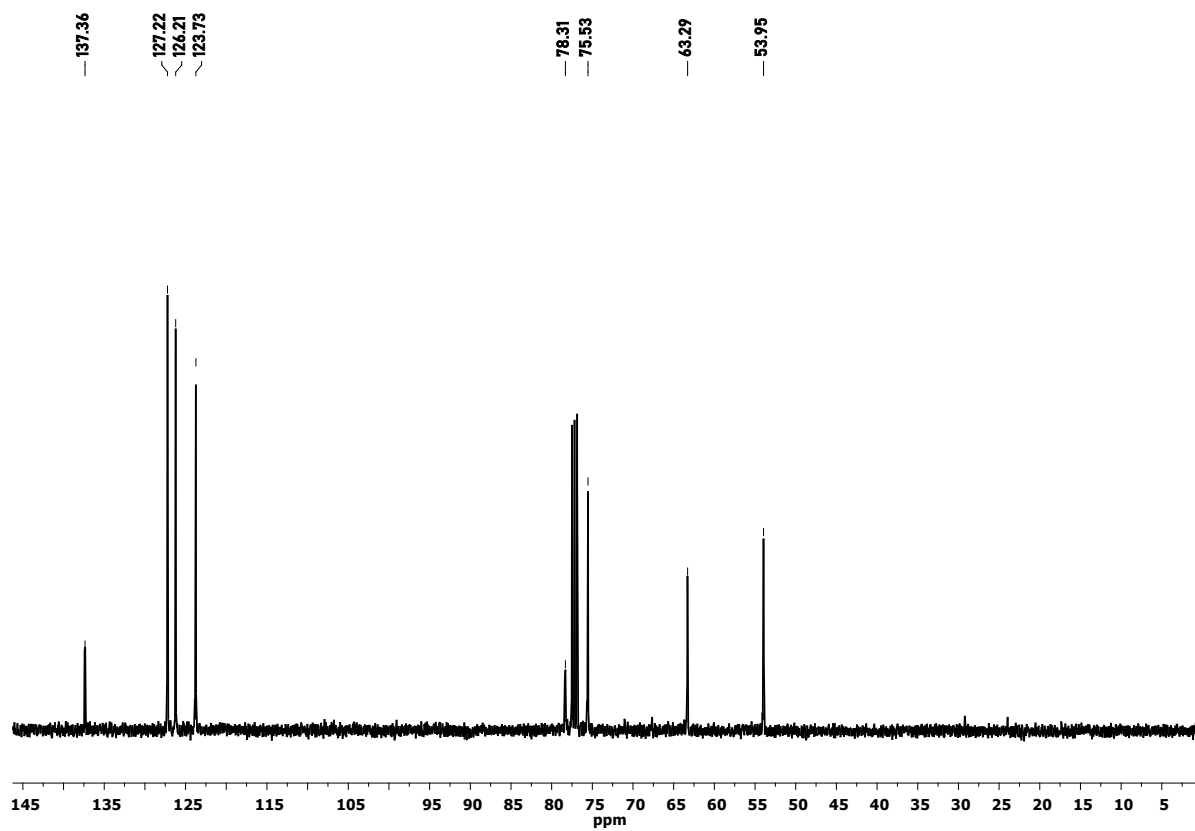

Figure S8. The  $^{13}\text{C}$  NMR spectrum of compound **2** in  $\text{CDCl}_3$

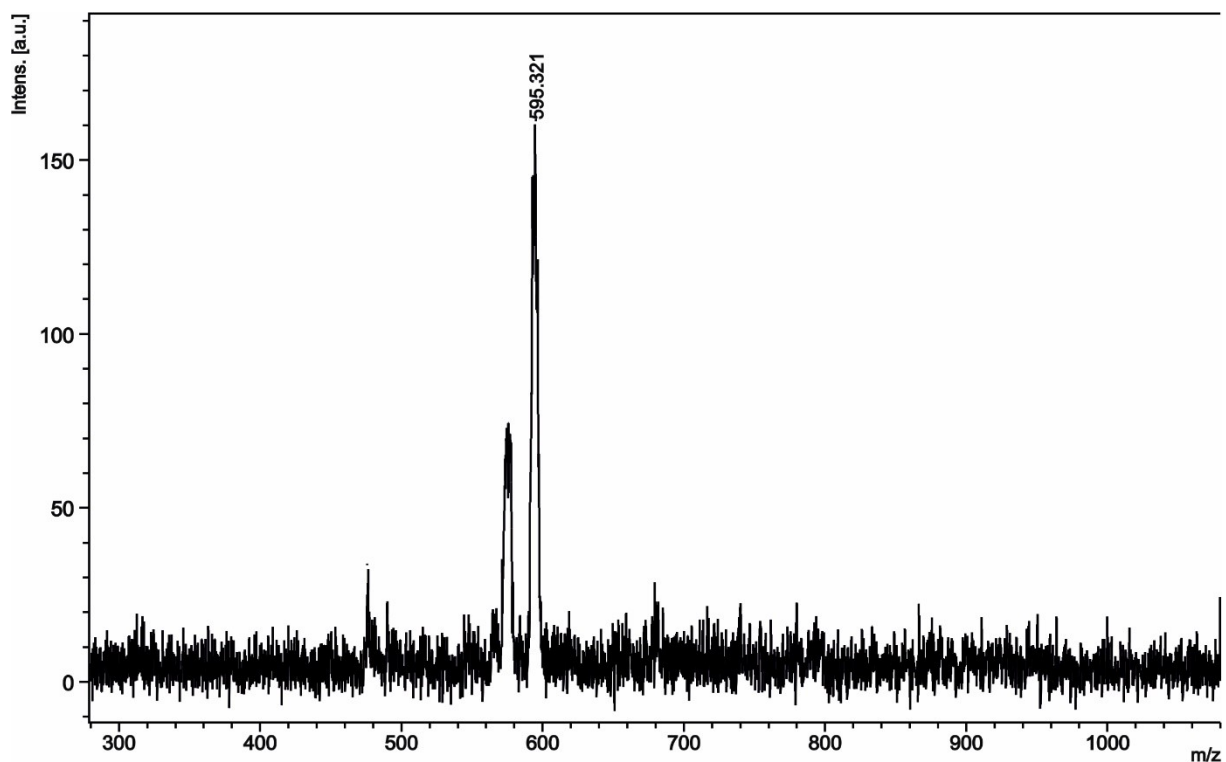

Figure S9. The MALDI TOF spectrum of compound 4

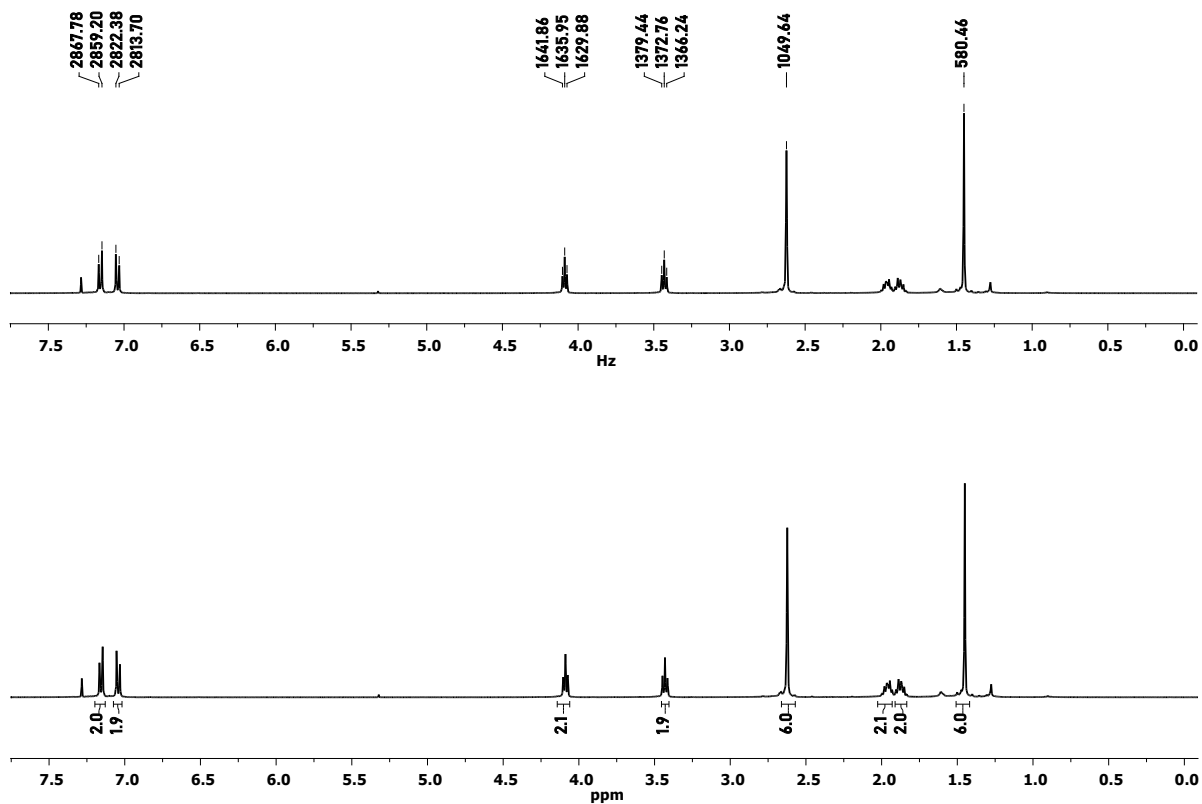

Figure S10. The  $^1\text{H}$  NMR spectrum of compound 4 in  $\text{CDCl}_3$

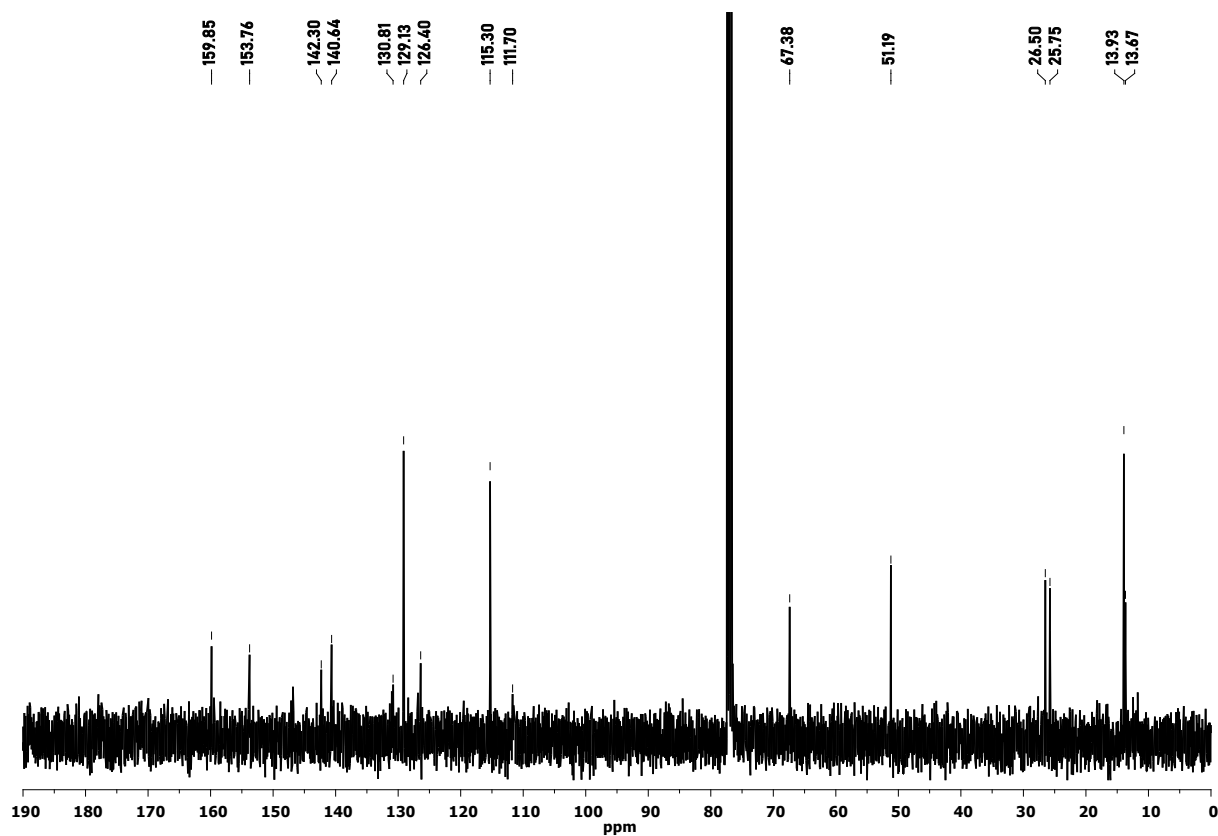

Figure S11. The  $^{13}\text{C}$  NMR spectrum of compound **4** in  $\text{CDCl}_3$

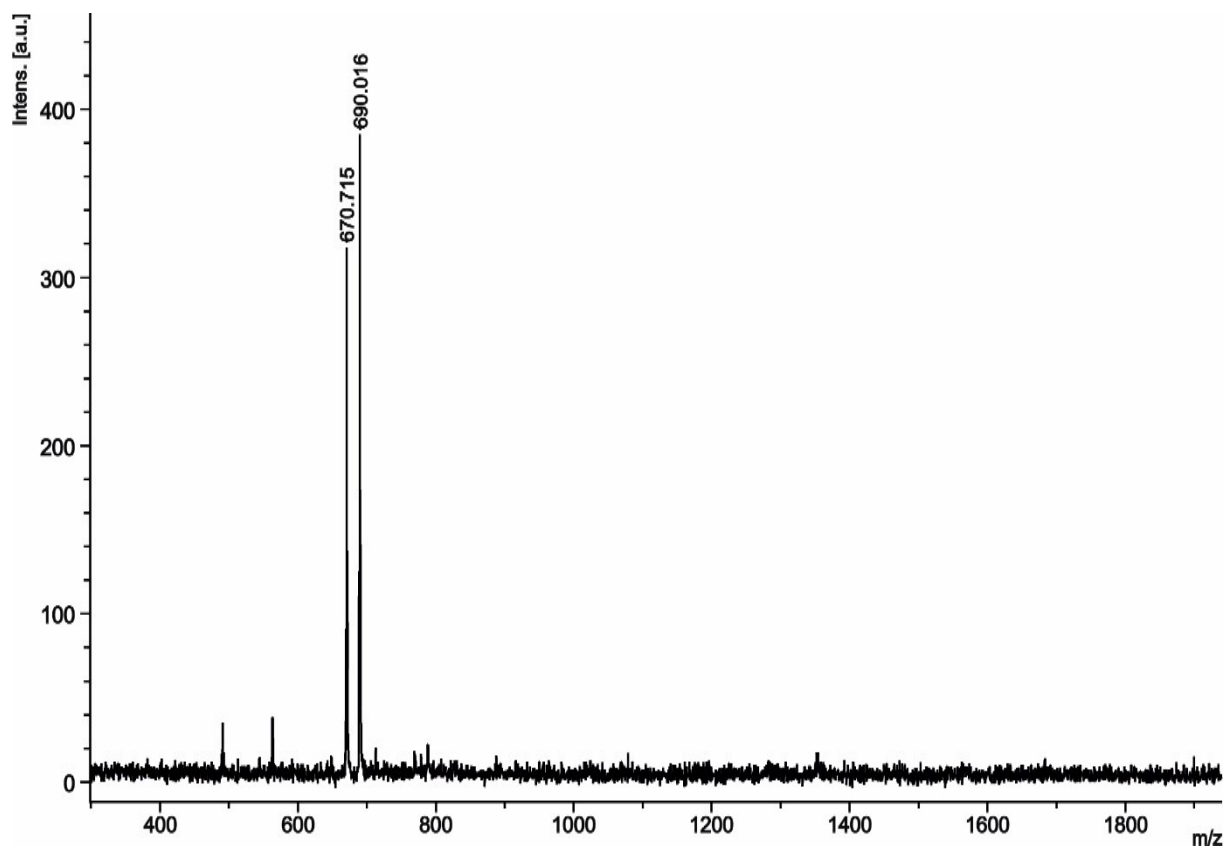

Figure S12. The MALDI TOF spectrum of compound **5** in  $\text{CDCl}_3$

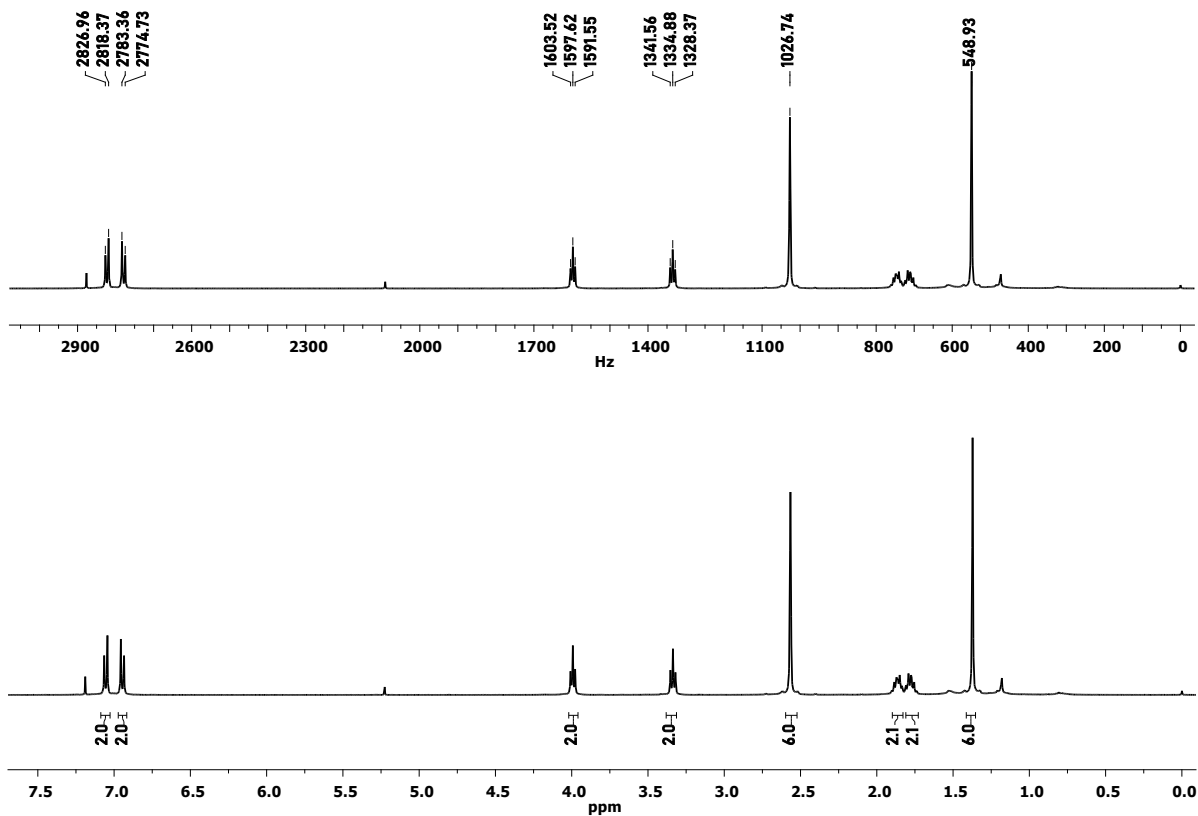

Figure S13. The  $^1\text{H}$  NMR spectrum of compound 5 in  $\text{CDCl}_3$

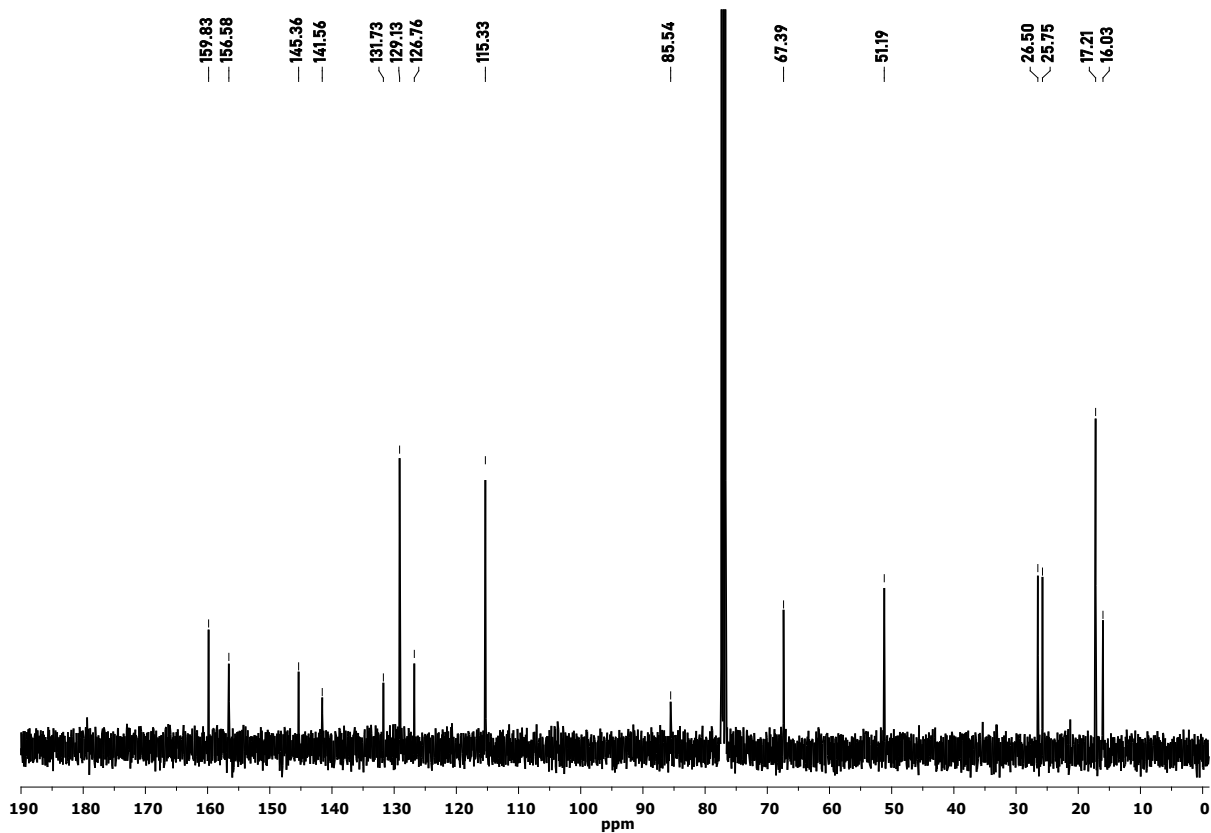

Figure S14. The  $^{13}\text{C}$  NMR spectrum of compound 5 in  $\text{CDCl}_3$



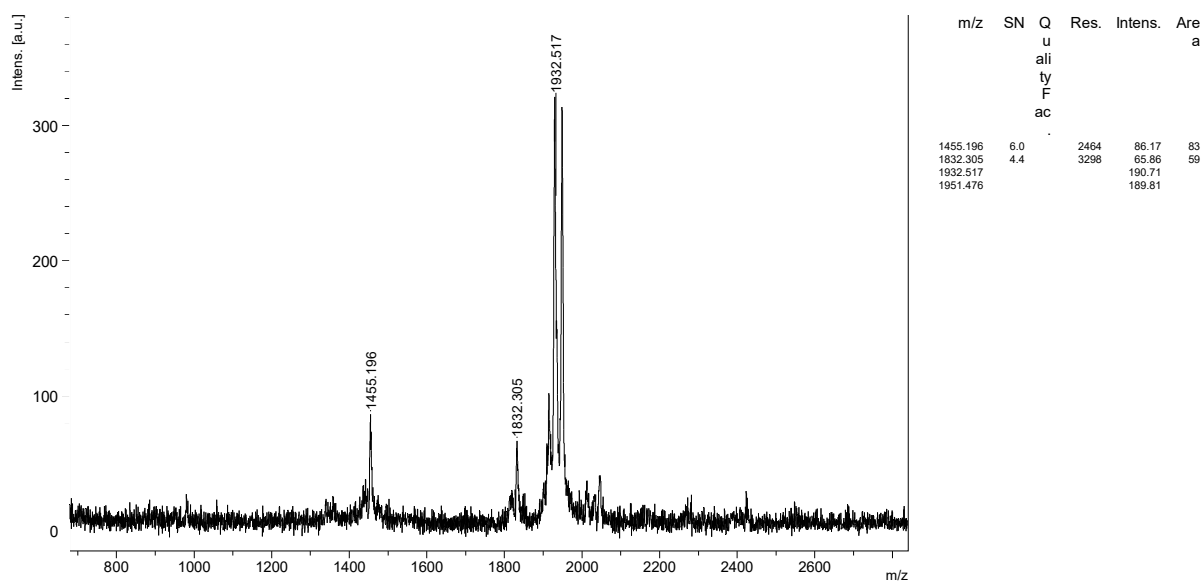

Figure S15. The MALDI TOF spectrum of compound 6

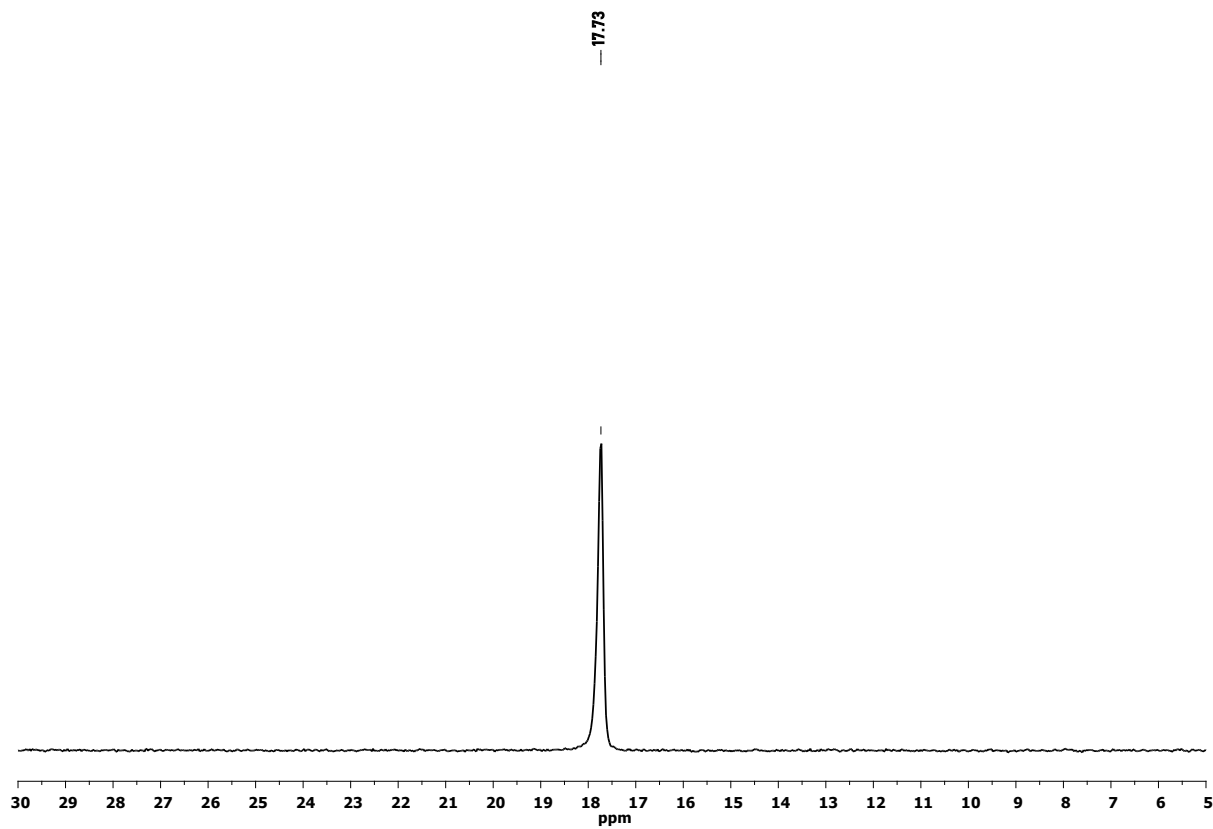

Figure S16. The proton-decoupled  $^{31}\text{P}$  NMR spectrum of compound 6 in  $\text{CDCl}_3$

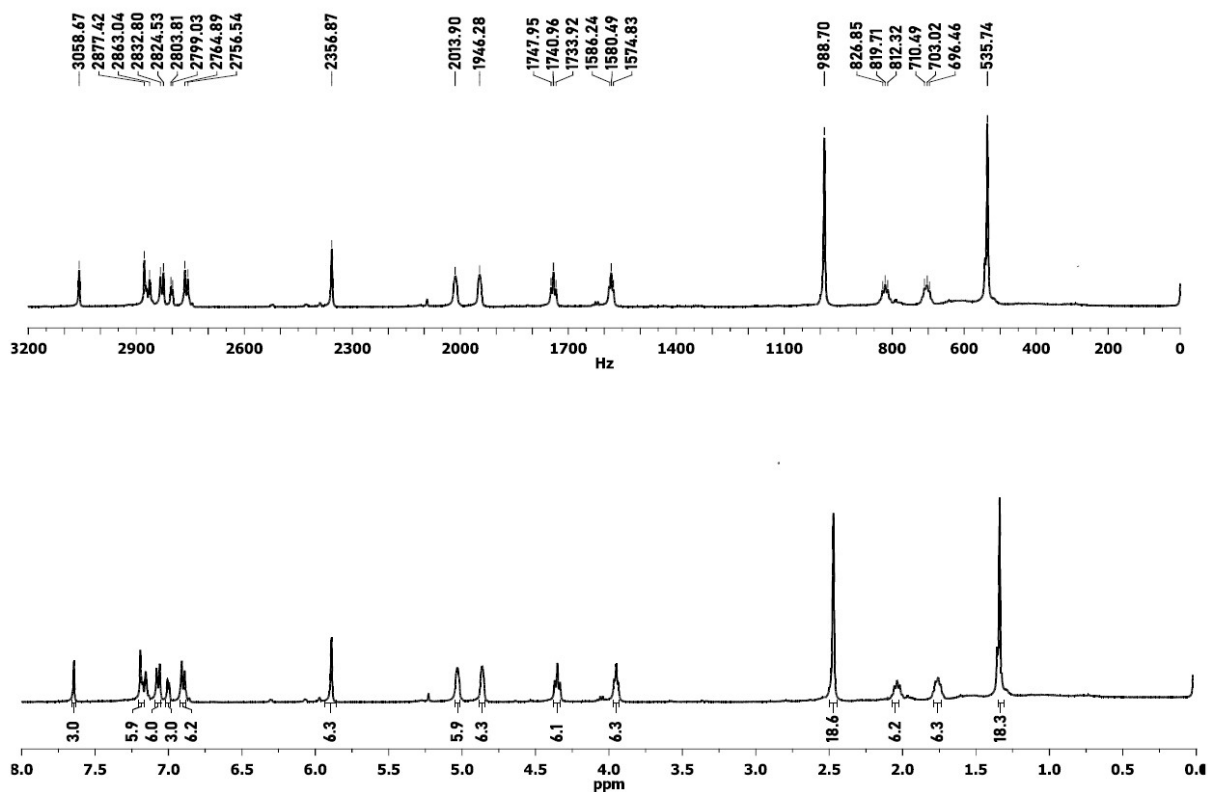

Figure S17. The  $^1\text{H}$  NMR spectrum of compound **6** in  $\text{CDCl}_3$

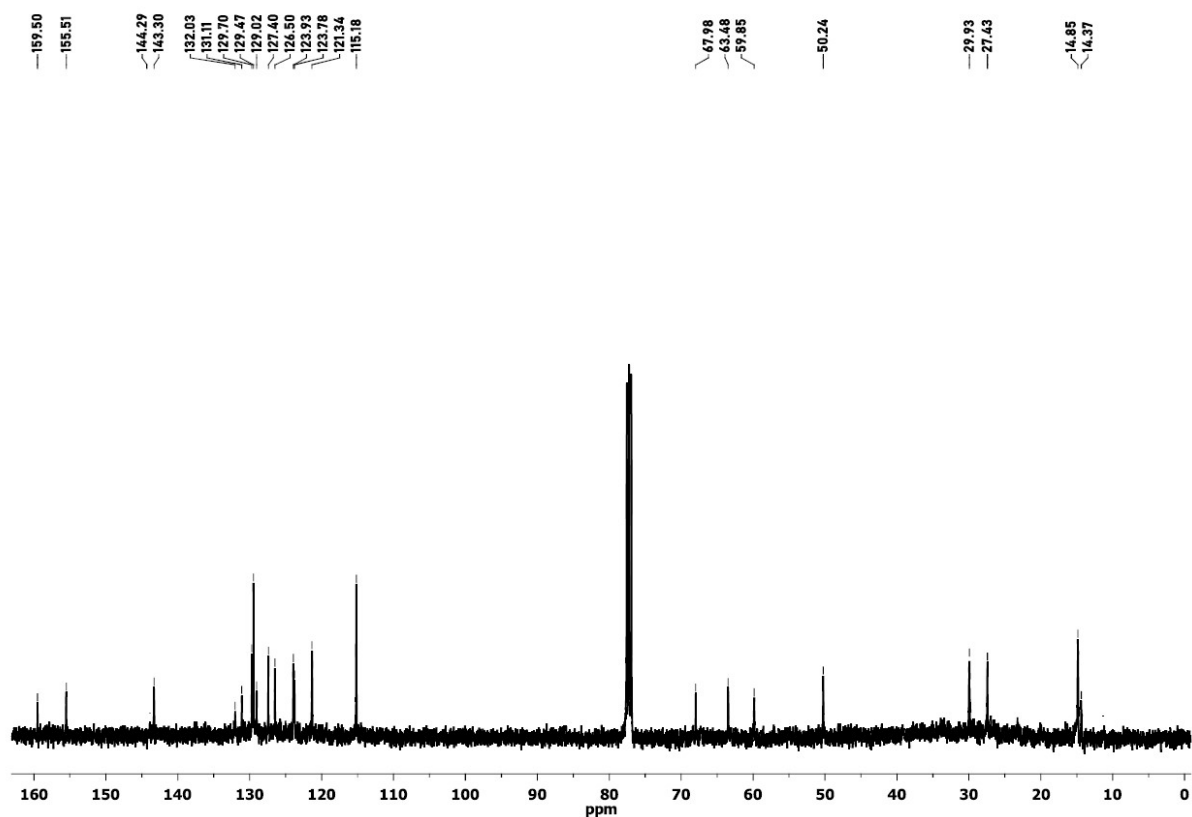

Figure S18. The  $^{13}\text{C}$  NMR spectrum of compound **6** in  $\text{CDCl}_3$

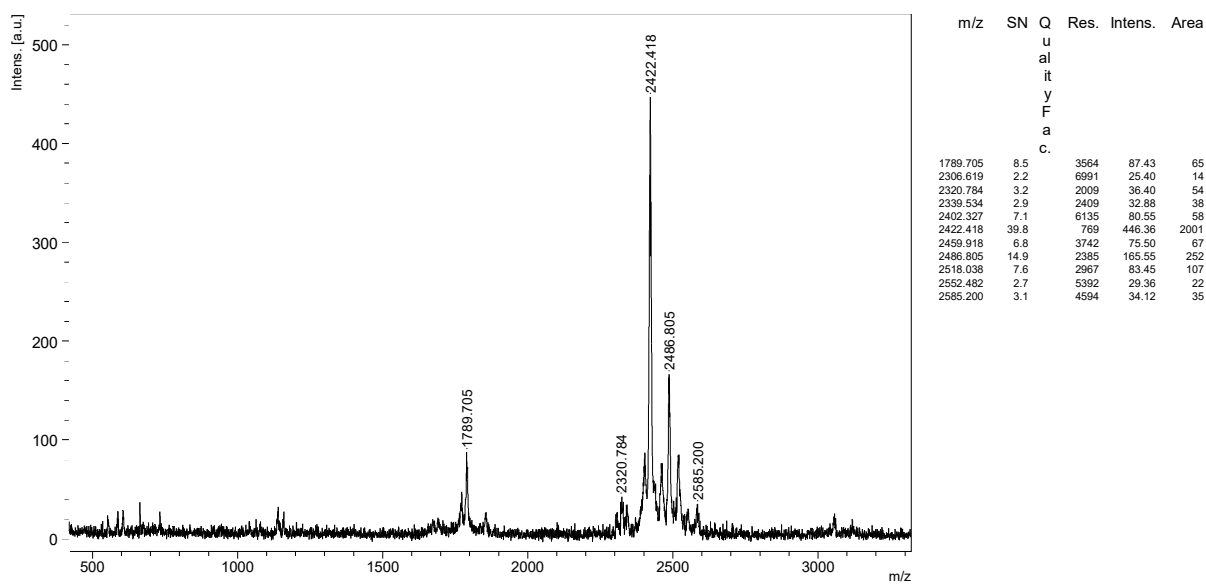

Figure S19. The MALDI TOF spectrum of compound 7

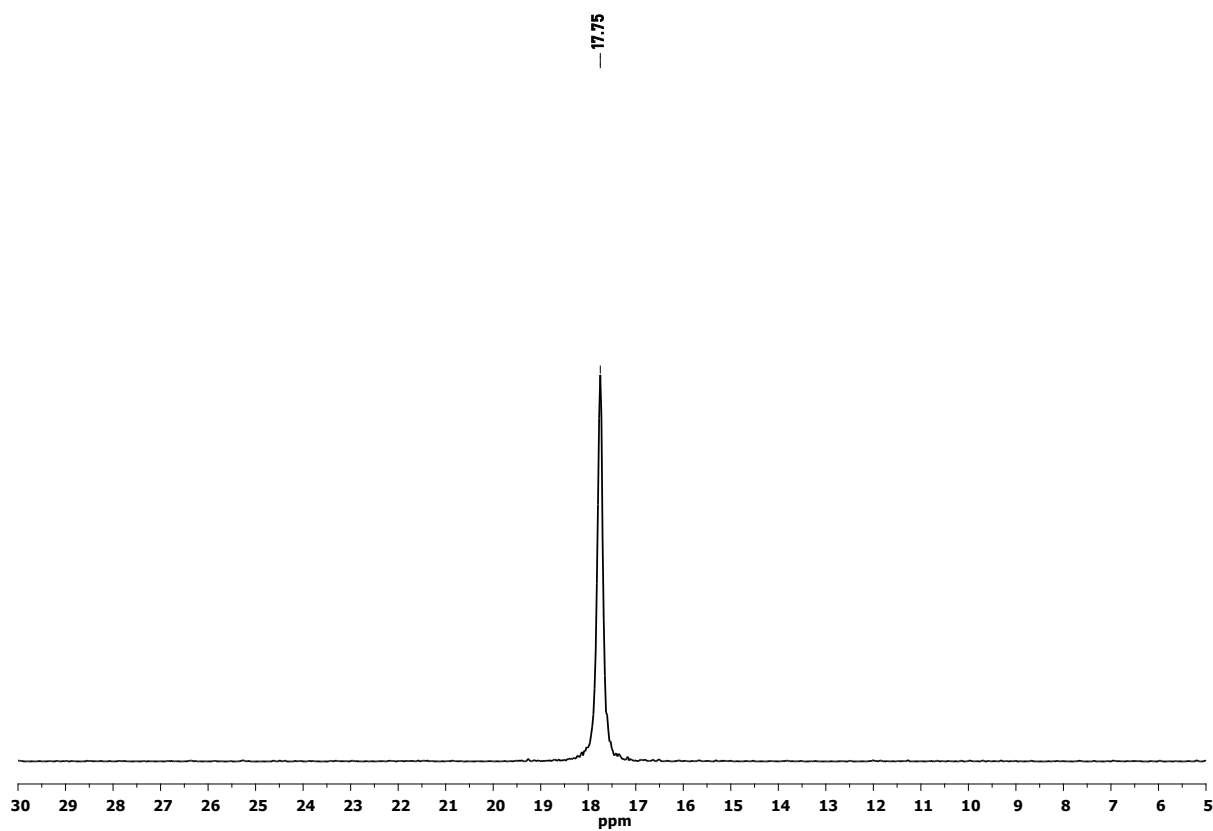

Figure S20. The proton-decoupled  $^{31}\text{P}$  NMR spectrum of compound 7 in  $\text{CDCl}_3$

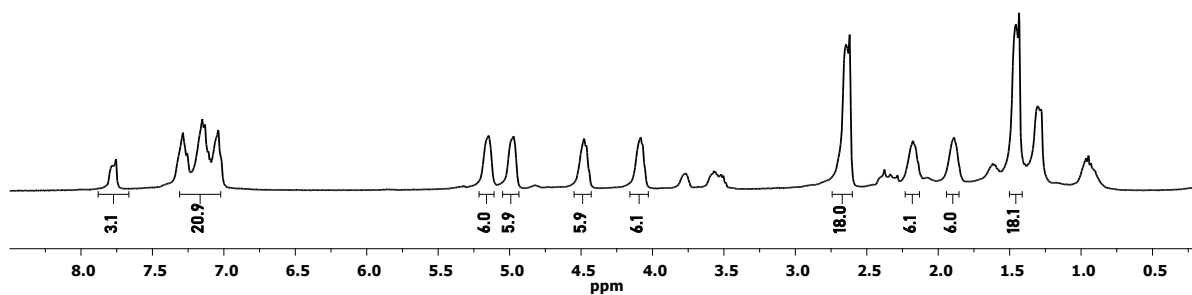

Figure S21. The  $^1\text{H}$  NMR spectrum of compound **7** in  $\text{CDCl}_3$

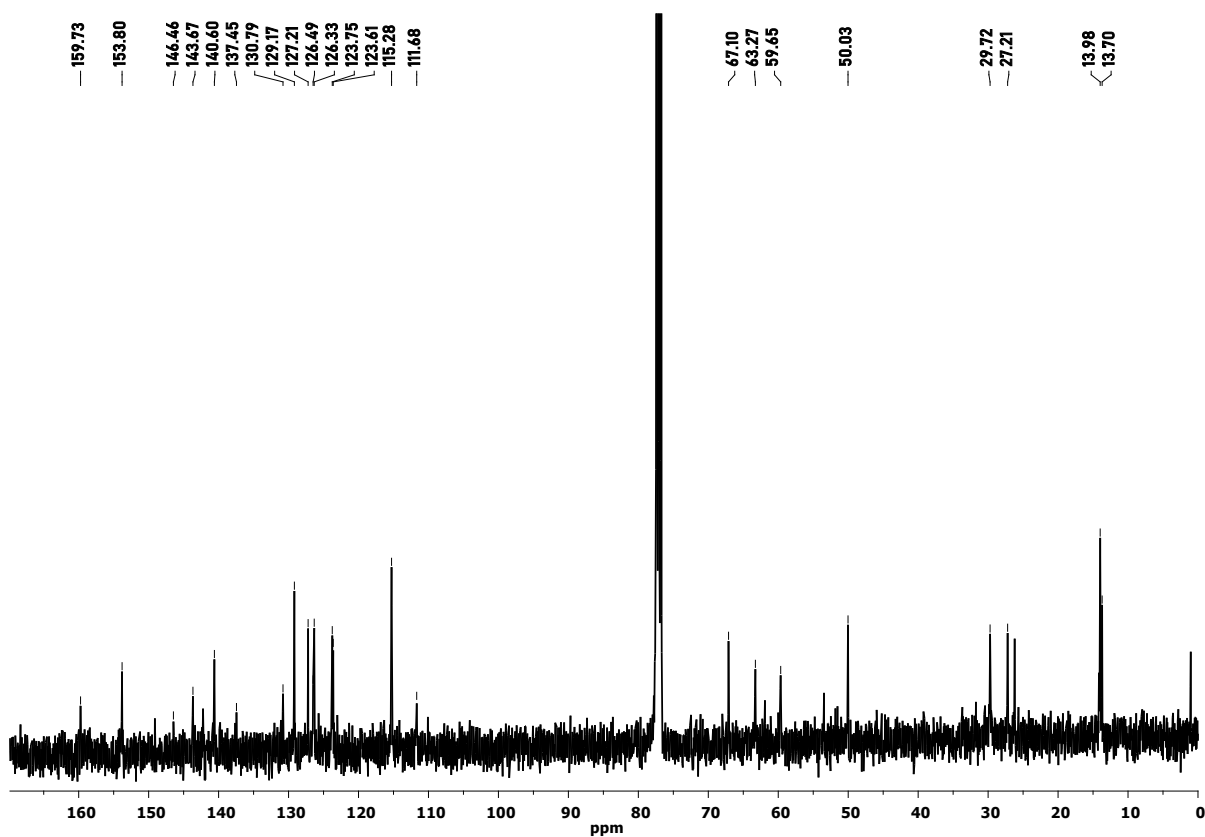

Figure S22. The  $^{13}\text{C}$  NMR spectrum of compound **7** in  $\text{CDCl}_3$

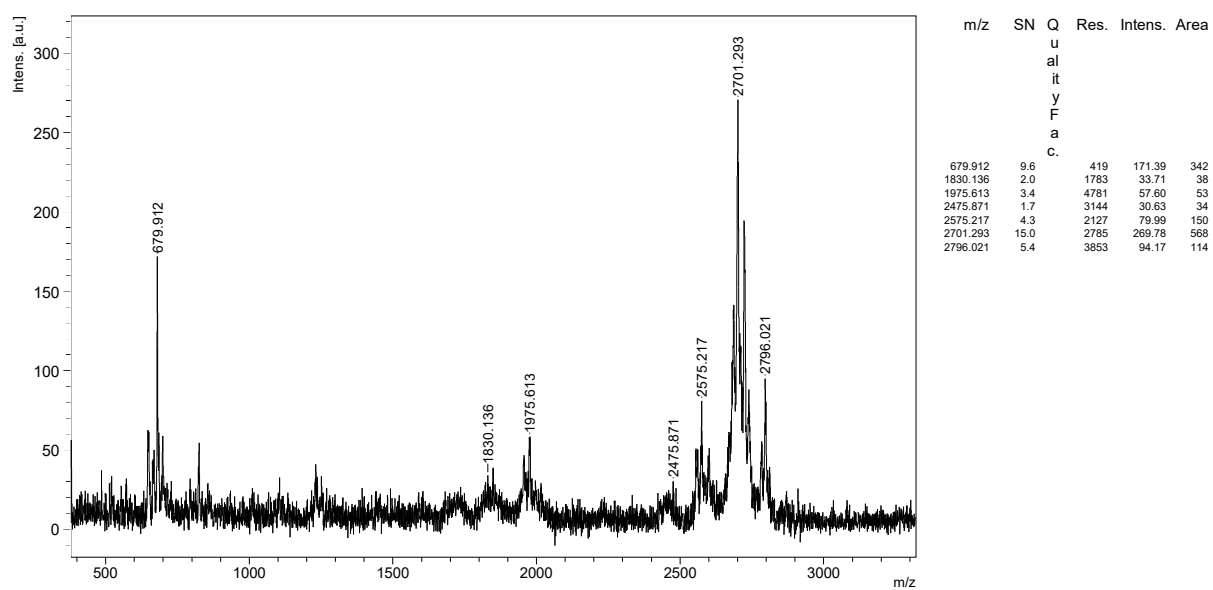

Figure S23. The MALDI TOF spectrum of compound **8**

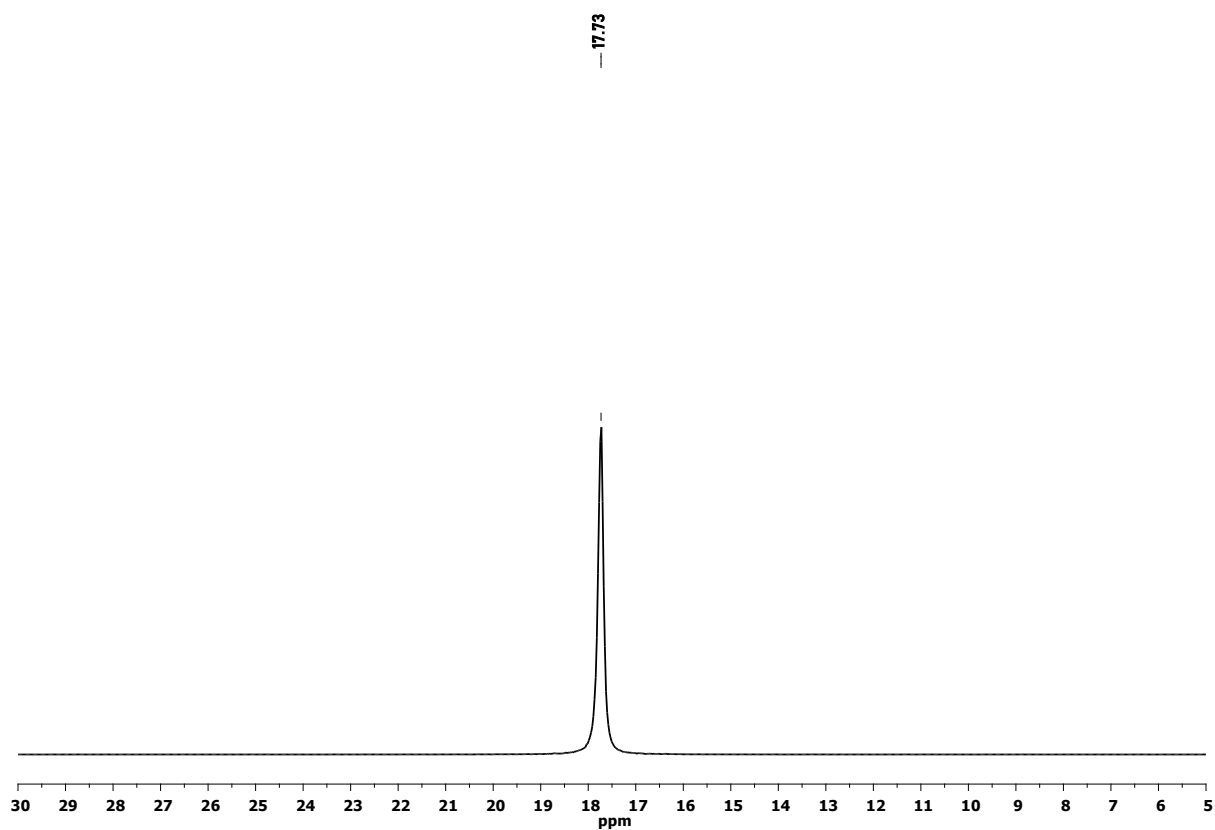

Figure S24. The proton-decoupled  $^{31}\text{P}$  NMR spectrum of compound **8** in  $\text{CDCl}_3$

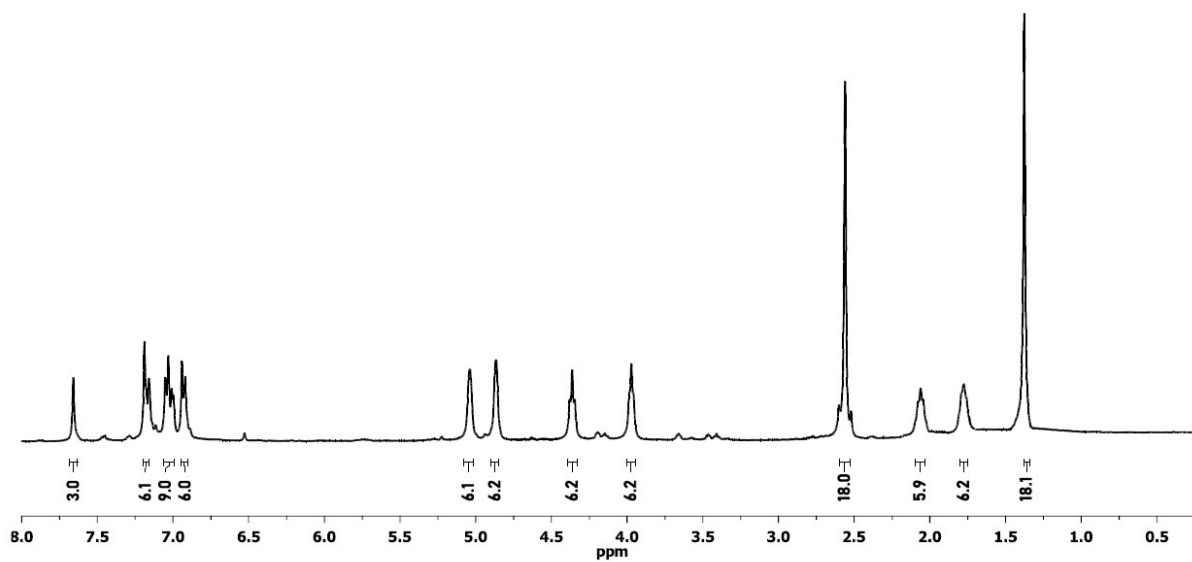

Figure S25. The  $^1\text{H}$  NMR spectrum of compound **8** in  $\text{CDCl}_3$

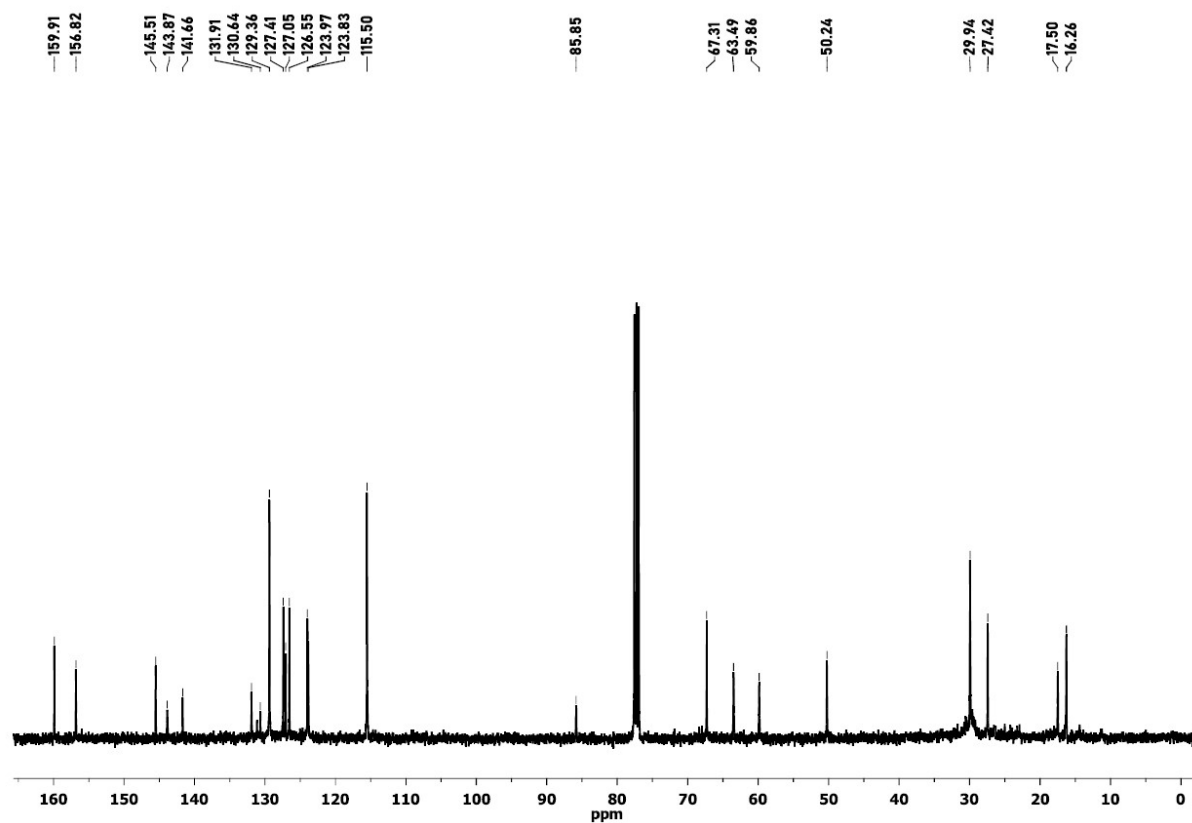

Figure S26. The  $^{13}\text{C}$  NMR spectrum of compound **8** in  $\text{CDCl}_3$

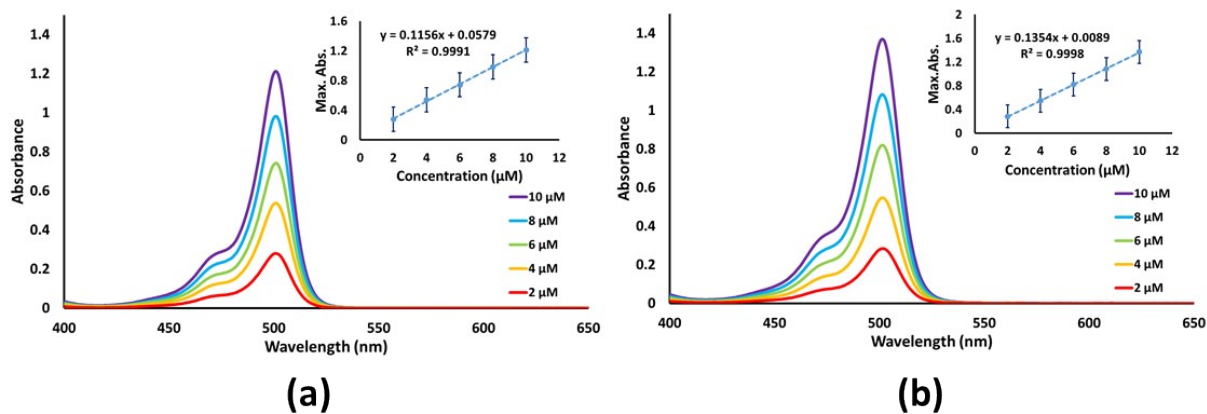

Figure S27. UV-Vis spectra of a) BODIPY 3 b) BODIPY-cyclotriphosphazene 6 in DCM (10-2  $\mu\text{M}$ )

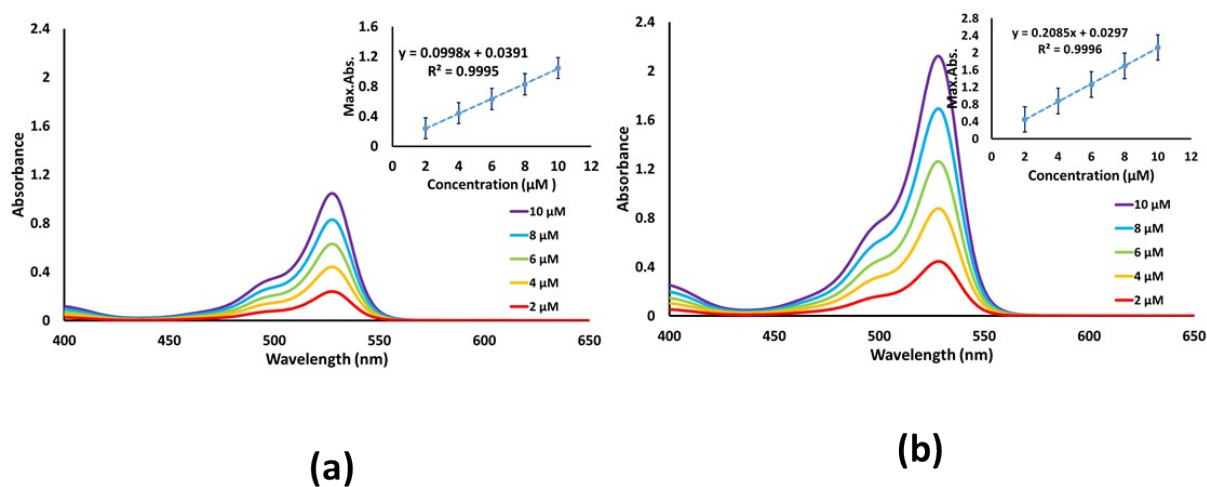

Figure S28. UV-Vis spectra of a) BODIPY 4 b) BODIPY-cyclotriphosphazene 7 in DCM (10-2  $\mu\text{M}$ )

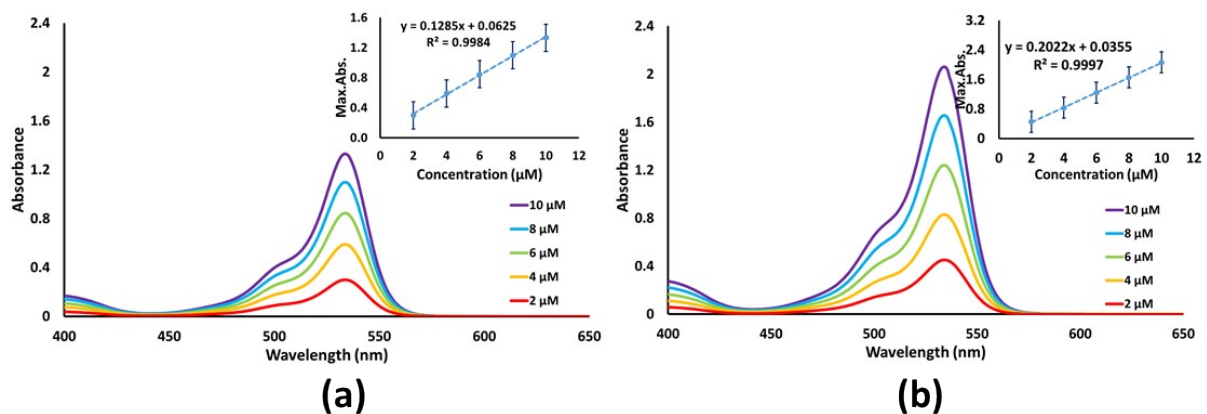

Figure S29. UV-Vis spectra of a) BODIPY 5 b) BODIPY-cyclotriphosphazene 8 in DCM (10-2  $\mu\text{M}$ )

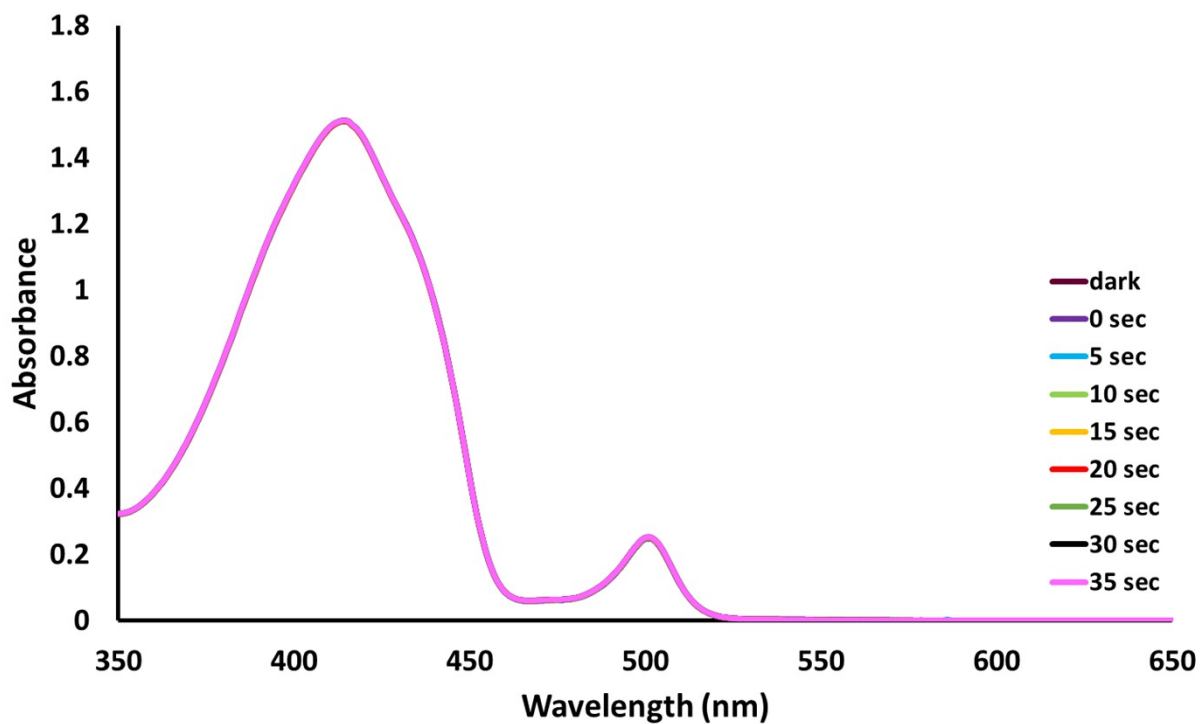

**Figure S30.** Decrease in absorbance spectrum of DPBF in the presence of BODIPY 3 (2.0  $\mu\text{M}$ , in DCM,  $\lambda = 516 \text{ nm}$ ,  $2.1 \text{ mW cm}^{-2}$ )

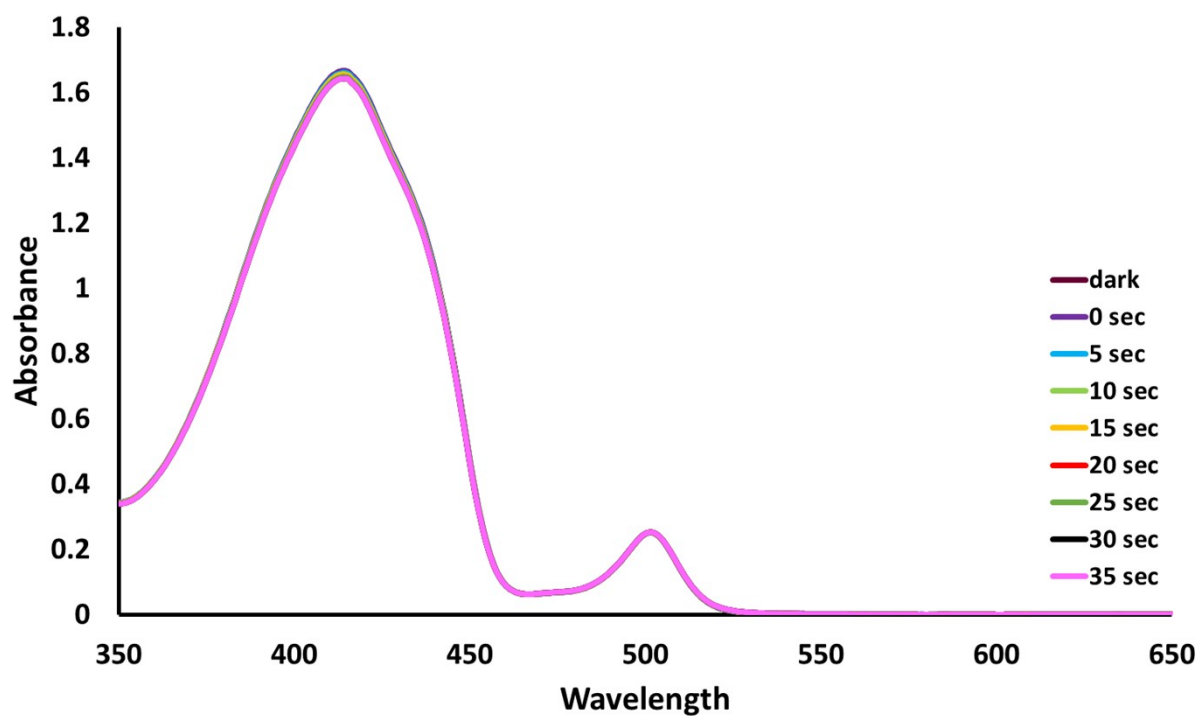

**Figure S31.** Decrease in absorbance spectrum of DPBF in the presence of BODIPY 6 (2.0  $\mu\text{M}$ , in DCM,  $\lambda = 516 \text{ nm}$ ,  $2.1 \text{ mW cm}^{-2}$ )



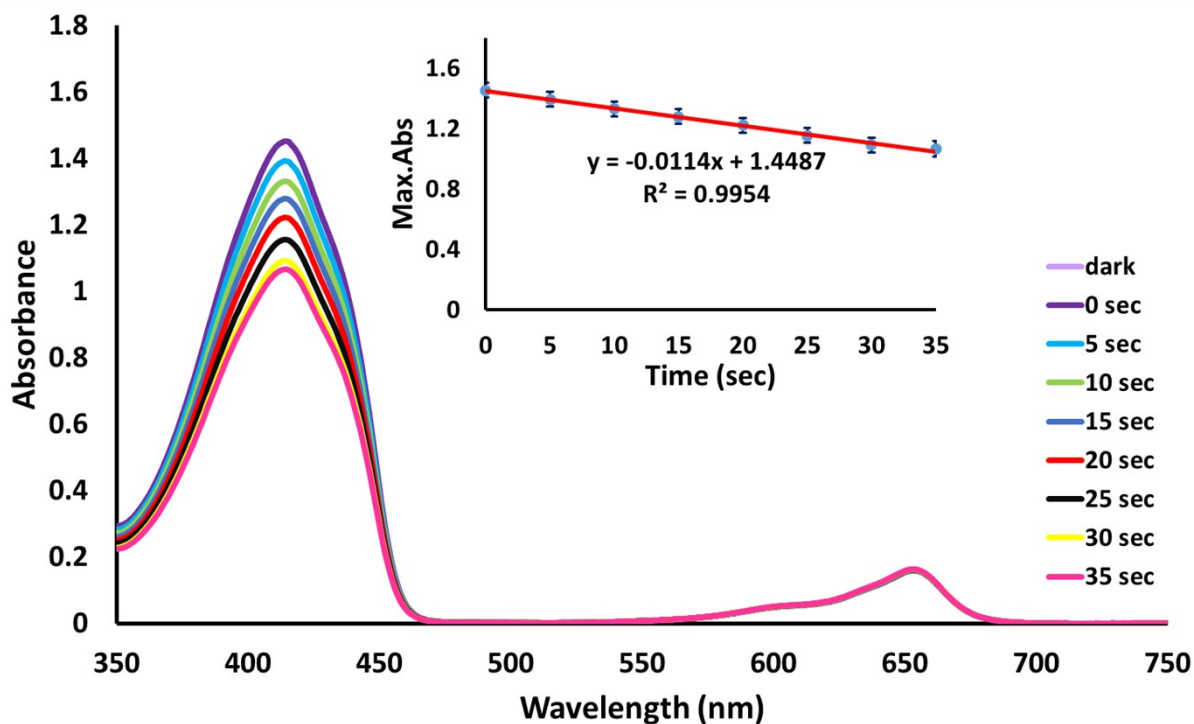

**Figure S32.** Decrease in absorbance spectrum of DPBF in the presence of methylene blue (2  $\mu\text{M}$ , in DCM, 632 nm, 2.5  $\text{mW cm}^{-2}$ )

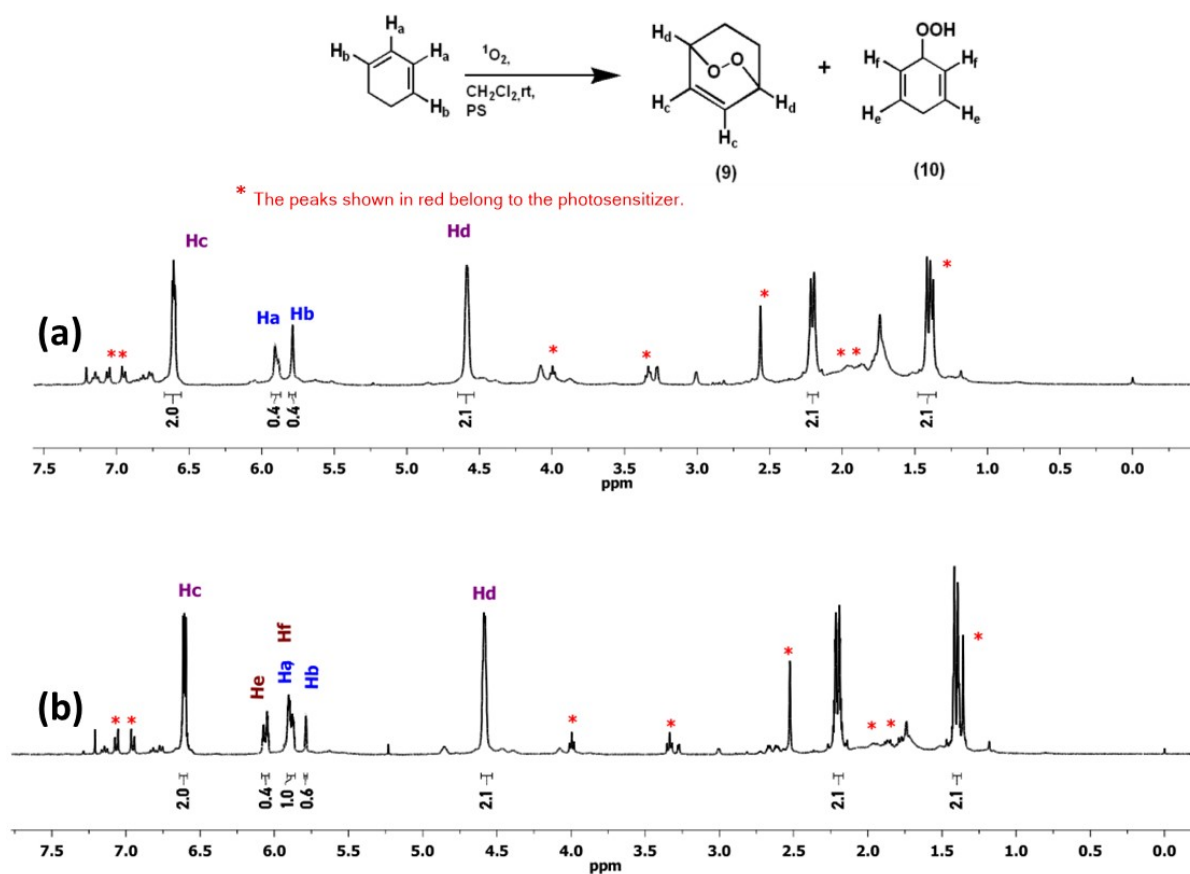

**Figure S33**  $^1\text{H}$  NMR spectra of (a) PS-5, (b) PS-4 in the presence of 1,3-cyclohexadiene (100 eq.) after irradiation with green light for 1 h.

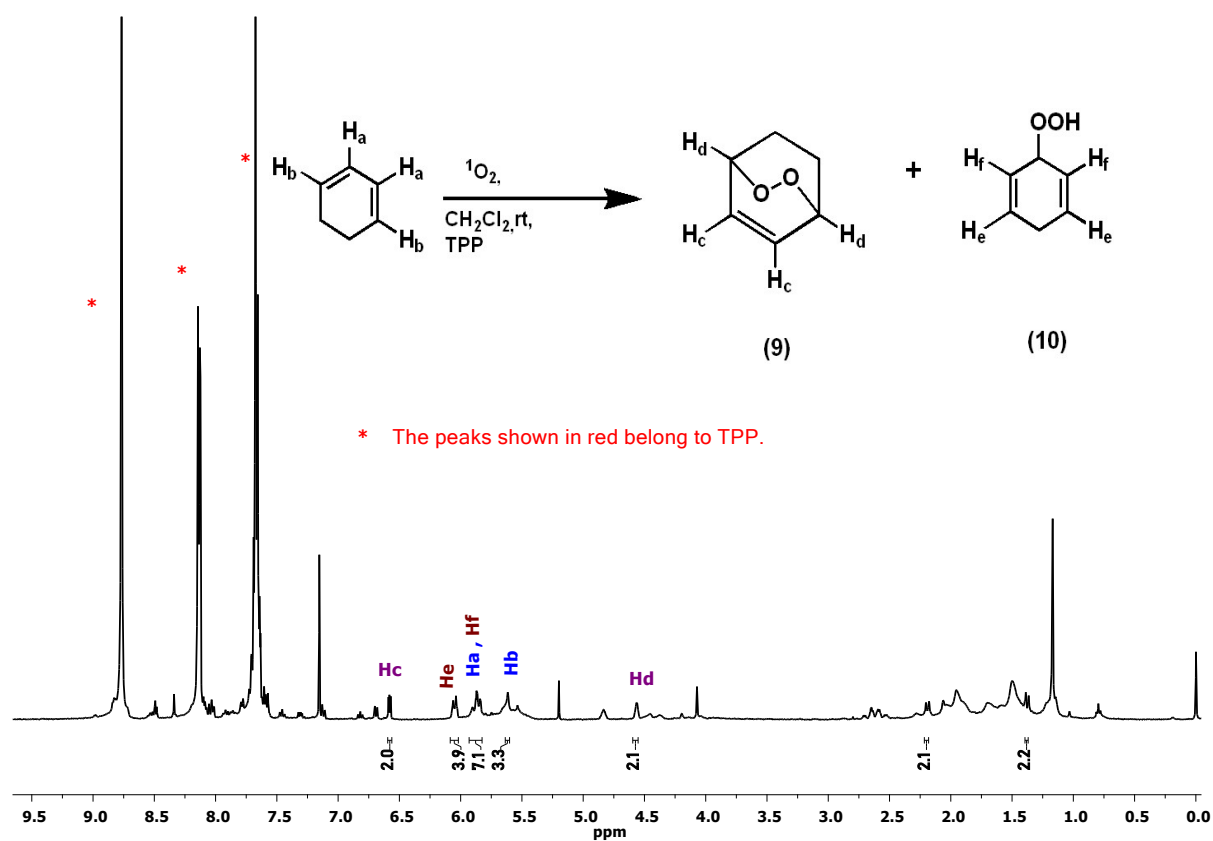

**Figure S34**  $^1\text{H}$  NMR spectrum of TPP in the presence of 1,3-cyclohexadiene (100 eq.) after irradiation with green light
